# Supplementary material for: Short Linear Motifs Characterizing Snake Venom and Mammalian Phospholipases A2
Source: MDPI journal article supplement (doi:10.3390/toxins13040290), 2021-04-20
Supplement: s1 [file s1]

# Supplementary Materials: Short Linear Motifs Characterizing Snake Venom and Mam-malian Phospholipases A2

Caterina Peggion and Fiorella Tonello

**Table S1.** SLiMs contained in snake venom group I PLA2 and in mammalian PLA2G1B. In brackets the number of proteins belonging to each group; column numbers indicate the number of proteins in the corresponding group that possess the SLiMs listed in the next column.

| N° | PLA2G1B (10)       | N° | G1 NeuroMyotoxins (7) | N° | G1 Neurotoxins (13)  |
|----|--------------------|----|-----------------------|----|----------------------|
| 10 | DOC_WW_Pin1_4      | 7  | DEG_Nend_UBRbox_3     | 12 | DEG_Nend_UBRbox_3    |
| 10 | LIG_FHA_2          | 7  | LIG_FHA_2             | 12 | DOC_WW_Pin1_4        |
| 10 | LIG_IBAR_NPY_1     | 7  | LIG_SH2_STAT5         | 12 | LIG_FHA_2            |
| 10 | LIG_SH2_STAP1      | 6  | MOD_GlcNHglycan       | 12 | LIG_SH2_STAT5        |
| 10 | LIG_SH2_STAT5      | 5  | DOC_WW_Pin1_4         | 12 | MOD_ProDKin_1        |
| 10 | MOD_GlcNHglycan    | 5  | MOD_ProDKin_1         | 9  | MOD_GlcNHglycan      |
| 10 | MOD_GSK3_1         | 4  | CLV_PCSK_PC1ET2_1     | 8  | DOC_USP7_MATH_1      |
| 10 | MOD_ProDKin_1      | 4  | MOD_NEK2_2            | 8  | LIG_14-3-3_CanoR_1   |
| 10 | TRG_ENDOCYTIC_2    | 4  | TRG_ENDOCYTIC_2       | 7  | CLV_PCSK_PC1ET2_1    |
| 9  | LIG_SH2_CRK        | 3  | DOC_MAPK_MEF2A_6      | 7  | MOD_GSK3_1           |
| 9  | MOD_NEK2_1         | 3  | LIG_SH2_NCK_1         | 7  | MOD_OFUCOSY          |
| 8  | LIG_BRCT_BRCA1_1   | 3  | LIG_SH2_SRC           | 7  | TRG_ENDOCYTIC_2      |
| 7  | TRG_ER_diLys_1     | 3  | LIG_SH3_3             | 6  | CLV_PCSK_SKI1_1      |
| 6  | LIG_SH2_GRB2like   | 3  | MOD_Plk_4             | 6  | LIG_PTB_Apo_2        |
| 6  | MOD_N-GLC_2        | 3  | MOD_LATS_1            | 6  | LIG_PTB_Phospho_1    |
| 5  | LIG_SH3_3          | 3  | MOD_PKA_1             | 6  | LIG_SH2_NCK_1        |
| 5  | MOD_CK1_1          | 3  | MOD_PKA_2             | 6  | MOD_N-GLC_2          |
| 5  | MOD_CK2_1          | 3  | TRG_ER_diLys_1        | 6  | MOD_PKA_1            |
| 4  | DOC_USP7_UBL2_3    | 2  | CLV_NRD_NRD_1         | 6  | MOD_PKA_2            |
| 4  | LIG_BIR_II_1       | 2  | CLV_PCSK_SKI1_1       | 5  | LIG_SH2_CRK          |
| 3  | CLV_PCSK_SKI1_1    | 2  | DOC_CYCLIN_RXL_1      | 5  | MOD_Cter_Amidation   |
| 2  | CLV_PCSK_PC1ET2_1  | 2  | DOC_USP7_MATH_1       | 4  | LIG_SH2_GRB2like     |
| 2  | MOD_SUMO_rev_2     | 2  | MOD_GSK3_1            | 4  | LIG_SH3_3            |
| 1  | CLV_C14_Caspase3-7 | 2  | MOD_PIKK_1            | 4  | LIG_TYR_ITIM         |
| 1  | CLV_NRD_NRD_1      | 2  | TRG_NLS_MonoExtN_4    | 4  | MOD_NEK2_2           |
| 1  | DOC_CKS1_1         | 1  | CLV_C14_Caspase3-7    | 4  | MOD_Plk_4            |
| 1  | DOC_SPAK_OSRI_1    | 1  | DOC_MAPK_gen_1        | 4  | TRG_ER_diLys_1       |
| 1  | LIG_14-3-3_CanoR_1 | 1  | DOC_PP1_RVXF_1        | 3  | CLV_NRD_NRD_1        |
| 1  | LIG_AP2alpha_2     | 1  | LIG_LIR_Gen_1         | 3  | DOC_MAPK_MEF2A_6     |
| 1  | LIG_LIR_Gen_1      | 1  | LIG_PTB_Apo_2         | 3  | LIG_14-3-3_CterR_2   |
| 1  | LIG_PDZ_Class_3    | 1  | LIG_PTB_Phospho_1     | 3  | LIG_LIR_Gen_1        |
| 1  | LIG_SH2_NCK_1      | 1  | LIG_SH2_GRB2like      | 3  | LIG_SH2_SRC          |
| 1  | MOD_N-GLC_1        | 1  | MOD_CDK_SPxxK_3       | 3  | LIG_TYR_ITIM         |
|    |                    | 1  | MOD_CK1_1             | 3  | MOD_LATS_1           |
|    |                    | 1  | MOD_OFUCOSY           | 3  | MOD_SUMO_rev_2       |
|    |                    | 1  | MOD_SUMO_rev_2        | 3  | TRG_LysEnd_APsAcLL_1 |
|    |                    | 1  | TRG_ER_diArg_1        | 2  | DOC_AGCK_PIF_1       |
|    |                    | 1  | TRG_NLS_MonoExtC_3    | 2  | DOC_MAPK_gen_1       |
|    |                    |    |                       | 2  | DOC_USP7_UBL2_3      |

|   |                       |
|---|-----------------------|
| 2 | MOD_CK1_1             |
| 2 | MOD_PIKK_1            |
| 2 | TRG_NLS_MonoExtN_4    |
| 1 | CLV_C14_Caspase3-7    |
| 1 | DEG_APCC_DBOX_1       |
| 1 | DOC_CYCLIN_RXL_1      |
| 1 | LIG_FHA_1             |
| 1 | LIG_HCF-1_HBM_1       |
| 1 | LIG_Integrin_isoDGR_1 |
| 1 | MOD_CDK_SPK_2         |
| 1 | MOD_CK2_1             |
| 1 | MOD_NEK2_1            |
| 1 | TRG_ER_diArg_1        |

**Table S2.** SLiMs contained in snake venom group II PLA2 and in mammalian PLA2G2A. In brackets the number of proteins belonging to each group; column numbers report the number of proteins in the corresponding group that possess the SLiMs listed in the next column.

| N° | PLA2G2A (10)       | N° | Myotx Not D49 (24) | N° | Myotoxins D49 (14) | N° | Neu-myot NOT D49 (5) | N° | Neuromyot D49 (9)  | N° | Neurotoxins (11) |
|----|--------------------|----|--------------------|----|--------------------|----|----------------------|----|--------------------|----|------------------|
| 10 | DOC_WW_Pin1_4      | 24 | MOD_PK_A_1         | 14 | TRG_END OCYTIC_2   | 5  | DOC_USP 7_UBL2_3     | 9  | LIG_SH2_STAT5      | 11 | LIG_SH2_STAT5    |
| 10 | LIG_FHA_1          | 23 | TRG_END OCYTIC_2   | 13 | LIG_SH2_STAT5      | 5  | LIG_PDZ_Class_3      | 9  | TRG_END OCYTIC_2   | 11 | TRG_END OCYTIC_2 |
| 10 | MOD_CD_K_SPK_2     | 23 | LIG_SH2_CRK        | 12 | MOD_NE_K2_1        | 5  | LIG_SH2_CRK          | 7  | CLV_PCS_K_SKI1_1   | 10 | LIG_FHA_2        |
| 9  | LIG_14-3-3_CanoR_1 | 23 | LIG_PDZ_Class_3    | 12 | LIG_FHA_2          | 5  | MOD_NE_K2_1          | 7  | DOC_USP 7_UBL2_3   | 10 | LIG_PDZ_Class_3  |
| 9  | LIG_FHA_2          | 23 | DOC_USP 7_UBL2_3   | 11 | MOD_GS_K3_1        | 5  | TRG_END OCYTIC_2     | 7  | MOD_NE_K2_1        | 10 | MOD_CK_1_1       |
| 9  | MOD_GS_K3_1        | 23 | CLV_PCS_K_SKI1_1   | 10 | LIG_SH2_CRK        | 4  | CLV_PCS_K_SKI1_1     | 6  | LIG_SH2_CRK        | 10 | MOD_NE_K2_1      |
| 9  | MOD_OF UCOSY       | 20 | MOD_NE_K2_1        | 10 | CLV_PCS_K_SKI1_1   | 4  | MOD_PK_A_1           | 6  | MOD_CK_1_1         | 9  | DOC_USP 7_UBL2_3 |
| 8  | CLV_PCS_K_PC1ET2_1 | 17 | MOD_PK_A_2         | 9  | LIG_PDZ_Class_3    | 4  | MOD_Plk_1            | 6  | MOD_OF UCOSY       | 9  | LIG_SH2_CRK      |
| 8  | DOC_USP 7_UBL2_3   | 17 | LIG_FHA_2          | 8  | MOD_Glc NHglycan   | 3  | LIG_14-3-3_CanoR_1   | 5  | LIG_14-3-3_CanoR_1 | 8  | MOD_CK_2_1       |
| 8  | MOD_Plk_1          | 17 | LIG_14-3-3_CanoR_1 | 8  | MOD_CK_2_1         | 3  | LIG_SH2_STAT5        | 5  | LIG_FHA_1          | 7  | CLV_PCS_K_SKI1_1 |
| 8  | MOD_Pro DKin_1     | 15 | LIG_SH2_STAT5      | 8  | LIG_Rb_L xCxE_1    | 3  | LIG_SH3_4            | 5  | LIG_FHA_2          | 7  | MOD_OF UCOSY     |
| 7  | LIG_BRCT_BRCA1_1   | 13 | MOD_Plk_4          | 8  | DOC_USP 7_UBL2_3   | 3  | LIG_TRF_H_1          | 5  | LIG_PDZ_Class_3    | 5  | CLV_NRD_NRD_1    |

|   |                   |    |                    |   |                     |   |                       |   |                   |   |                    |
|---|-------------------|----|--------------------|---|---------------------|---|-----------------------|---|-------------------|---|--------------------|
| 7 | MOD_CK_1_1        | 13 | MOD_OFUCOSY        | 7 | MOD_CK_1_1          | 3 | MOD_PK_A_2            | 5 | LIG_SH2_STAP1     | 5 | DOC_USP7_MATH_1    |
| 7 | MOD_CK_2_1        | 12 | MOD_GSK3_1         | 7 | CLV_PCSK_PC1ET2_1   | 3 | MOD_Plk_4             | 5 | MOD_CK_2_1        | 5 | DOC_WW_Pin1_4      |
| 7 | MOD_N-GLC_1       | 12 | MOD_Cter_Amidation | 6 | TRG_NLS_MonoExt_N_4 | 2 | LIG_BIR_I_1           | 5 | MOD_GSK3_1        | 5 | LIG_BRCT_BRCA1_1   |
| 7 | MOD_PK_A_2        | 12 | CLV_NRD_NRD_1      | 6 | MOD_ProDKin_1       | 2 | LIG_BRCT_BRCA1_1      | 5 | MOD_PK_A_2        | 5 | MOD_CD_K_SPK_2     |
| 6 | CLV_PCSK_SKI1_1   | 10 | LIG_SH3_4          | 6 | MOD_CD_K_SPxxK_3    | 2 | LIG_FHA_2             | 4 | DOC_WW_Pin1_4     | 5 | MOD_GSK3_1         |
| 6 | LIG_SH2-GRB2like  | 10 | LIG_Rb_LxCxE_1     | 6 | LIG_14-3-3_CanoR_1  | 2 | LIG_LIR_Gen_1         | 4 | MOD_CD_K_SPK_2    | 5 | MOD_PK_A_1         |
| 4 | DEG_Nend_UBRbox_2 | 9  | MOD_Plk_1          | 6 | DOC_WW_Pin1_4       | 2 | LIG_Rb_LxCxE_1        | 4 | MOD_ProDKin_1     | 5 | MOD_ProDKin_1      |
| 4 | LIG_SH2-STAP1     | 7  | MOD_N-GLC_1        | 6 | DOC_MAPK_gen_1      | 2 | MOD_CK_1_1            | 3 | DEG_Nend_UBRbox_2 | 4 | LIG_LIR_Gen_1      |
| 4 | TRG_ENDOCYTIC_2   | 6  | MOD_SUMO_rev_2     | 6 | DEG_Nend_UBRbox_3   | 2 | MOD_OFUCOSY           | 3 | DEG_Nend_UBRbox_3 | 4 | MOD_GlcNHglycan    |
| 3 | LIG_SH2-STAT5     | 6  | LIG_SH2-STAP1      | 6 | CLV_NRD_NRD_1       | 1 | CLV_C14_Caspase3-7    | 3 | DOC_MAPK_gen_1    | 4 | MOD_PK_A_2         |
| 3 | LIG_UBA_3_1       | 5  | MOD_ProDKin_1      | 5 | LIG_SH2-STAP1       | 1 | DEG_APC_C_DBOX_1      | 3 | LIG_LIR_Gen_1     | 4 | MOD_Plk_4          |
| 3 | MOD_GlcNHglycan   | 5  | MOD_N-GLC_2        | 4 | MOD_Plk_4           | 1 | DOC_MAPK_gen_1        | 3 | LIG_Rb_LxCxE_1    | 3 | DOC_MAPK_gen_1     |
| 3 | MOD_NEK2_1        | 5  | MOD_CK_2_1         | 4 | MOD_CD_K_SPK_2      | 1 | DOC_MAPK_MEF2_A_6     | 3 | MOD_GlcNHglycan   | 3 | LIG_14-3-3_CanoR_1 |
| 3 | TRG_ER_diArg_1    | 5  | LIG_TRFH_1         | 3 | TRG_ER_diArg_1      | 1 | DOC_USP7_MATH_1       | 3 | MOD_Plk_1         | 3 | LIG_SH2-NCK_1      |
| 2 | DOC_PP1_RVXF_1    | 5  | DOC_MAPK_gen_1     | 3 | MOD_PK_A_1          | 1 | DOC_WW_Pin1_4         | 2 | CLV_NRD_NRD_1     | 3 | MOD_PK_B_1         |
| 2 | LIG_TRAF2_1       | 4  | MOD_ProDKin_1      | 3 | MOD_NEK2_2          | 1 | LIG_deltaCOP1_diTrp_1 | 2 | CLV_PCSK_PC7_1    | 3 | TRG_ER_diArg_1     |
| 2 | MOD_PIK_K_1       | 4  | MOD_NEK2_2         | 3 | MOD_Cter_Amidation  | 1 | LIG_SH2-NCK_1         | 2 | LIG_BRCT_BRCA1_1  | 2 | DEG_Nend_UBRbox_3  |
| 2 | MOD_Plk_4         | 4  | MOD_CK_1_1         | 3 | LIG_FHA_1           | 1 | LIG_SH2_SRC           | 2 | LIG_MLH1_MIPbox_1 | 2 | LIG_FHA_1          |
| 2 | MOD_SUMO_rev_2    | 4  | DOC_WW_Pin1_4      | 3 | LIG_BRCT_BRCA1_1    | 1 | LIG_SH2-STAP1         | 2 | LIG_PDZ_Class_2   | 2 | LIG_SH2-STAP1      |

|   |                     |   |                     |   |                     |   |                  |   |                       |   |                     |
|---|---------------------|---|---------------------|---|---------------------|---|------------------|---|-----------------------|---|---------------------|
| 1 | CLV_C14_Caspase3-7  | 3 | TRG_NLS_MonoExt_N_4 | 3 | CLV_PCS_K_PC7_1     | 1 | MOD_CD_K_SPK_2   | 2 | LIG_Pex14_1           | 2 | LIG_UBA3_1          |
| 1 | LIG_Pex14_2         | 3 | CLV_PCS_K_PC1ET2_1  | 2 | TRG_ER_diLys_1      | 1 | MOD_CD_K_SPxK_1  | 2 | LIG_SUM_O_SIM_an ti_2 | 1 | CLV_C14_Caspase3-7  |
| 1 | LIG_SH2_STAT3       | 2 | MOD_Plk_2-3         | 2 | MOD_Plk_1           | 1 | MOD_CD_K_SPxxK_3 | 2 | LIG_TYR_ITAM          | 1 | CLV_PCS_K_FUR_1     |
| 1 | TRG_ER_diLys_1      | 2 | MOD_CD_K_SPK_2      | 2 | LIG_WW_1            | 1 | MOD_CK_2_1       | 2 | MOD_NE_K2_2           | 1 | CLV_PCS_K_PC1ET2_1  |
| 1 | TRG_NLS_Bipartite_1 | 2 | LIG_LIR_Gen_1       | 2 | LIG_PDZ_Class_2     | 1 | MOD_Glc_NHglycan | 2 | MOD_PK_B_1            | 1 | CLV_PCS_K_PC7_1     |
| 1 | TRG_NLS_MonoCore_2  | 2 | LIG_BIR_I_1         | 2 | LIG_LIR_Gen_1       | 1 | MOD_N-GLC_1      | 2 | MOD_Plk_4             | 1 | DOC_PP2_B_LxvP_1    |
| 1 | TRG_NLS_MonoExt_N_4 | 2 | DOC_USP_7_MATH_1    | 2 | LIG_BIR_I_1         | 1 | MOD_N-GLC_2      | 2 | MOD_PR_MT_GGR_GG_1    | 1 | LIG_PDZ_Class_2     |
|   |                     | 2 | DOC_MA_PK_NFAT_4_5  | 2 | DEG_Nen d_UBRbox_2  | 1 | MOD_Pro_DKin_1   | 2 | TRG_ER_diArg_1        | 1 | LIG_Rb_LxCxE_1      |
|   |                     | 2 | DOC_MA_PK_MEF2_A_6  | 1 | TRG_NLS_MonoExt_C_3 |   |                  | 2 | TRG_NLS_Bipartite_1   | 1 | LIG_TRAF2_1         |
|   |                     | 2 | DEG_APC_C_DBOX_1    | 1 | MOD_SU_MO_rev_2     |   |                  | 2 | TRG_NLS_MonoExt_N_4   | 1 | LIG_TRF_H_1         |
|   |                     | 1 | MOD_PK_1            | 1 | MOD_SU_MO_for_1     |   |                  | 1 | CLV_C14_Caspase3-7    | 1 | MOD_CD_K_SPxxK_3    |
|   |                     | 1 | MOD_Glc_NHglycan    | 1 | MOD_OF_UCOSY        |   |                  | 1 | CLV_PCS_K_KEX2_1      | 1 | MOD_Cte_r_Amidation |
|   |                     | 1 | LIG_UBA3_1          | 1 | MOD_N-GLC_1         |   |                  | 1 | CLV_PCS_K_PC1ET2_1    | 1 | MOD_Plk_1           |
|   |                     | 1 | LIG_SH2_STAT3       | 1 | LIG_UBA3_1          |   |                  | 1 | DEG_APC_C_DBOX_1      | 1 | MOD_SU_MO_rev_2     |
|   |                     | 1 | LIG_PTB_Apo_2       | 1 | LIG_TYR_ITIM        |   |                  | 1 | DOC_PP2_B_LxvP_1      | 1 | TRG_NLS_MonoExt_N_4 |

|   |                         |   |                             |   |                         |
|---|-------------------------|---|-----------------------------|---|-------------------------|
| 1 | LIG_PDZ_<br>Class_1     | 1 | LIG_TYR_<br>ITAM            | 1 | DOC_USP<br>7_MATH_<br>1 |
| 1 | LIG_APC<br>C_ABBA_<br>1 | 1 | LIG_TRF<br>H_1              | 1 | LIG_LIR_<br>Nem_3       |
|   |                         | 1 | LIG_SUM<br>O_SIM_pa<br>r_1  | 1 | LIG_SH2_<br>GRB2like    |
|   |                         | 1 | LIG_SUM<br>O_SIM_an<br>ti_2 | 1 | LIG_SH3_<br>4           |
|   |                         | 1 | LIG_SH3_<br>4               | 1 | LIG_TRF<br>H_1          |
|   |                         | 1 | LIG_SH3_<br>3               | 1 | LIG_UBA<br>3_1          |
|   |                         | 1 | LIG_SH2_<br>GRB2like        | 1 | MOD_N-<br>GLC_1         |
|   |                         | 1 | LIG_PCN<br>A_PIPBox<br>_1   | 1 | MOD_PK<br>A_1           |
|   |                         | 1 | LIG_MAD<br>2                | 1 | MOD_SU<br>MO_rev_2      |
|   |                         | 1 | LIG_EH_1                    |   |                         |
|   |                         | 1 | LIG_BRCT<br>_BRCA1_2        |   |                         |
|   |                         | 1 | DOC_USP<br>7_MATH_<br>1     |   |                         |
|   |                         | 1 | DOC_AG<br>CK_PIF_1          |   |                         |
|   |                         | 1 | DEG_Kelc<br>h_Keap1_<br>1   |   |                         |
|   |                         | 1 | DEG_APC<br>C_KENBO<br>X_2   |   |                         |

A

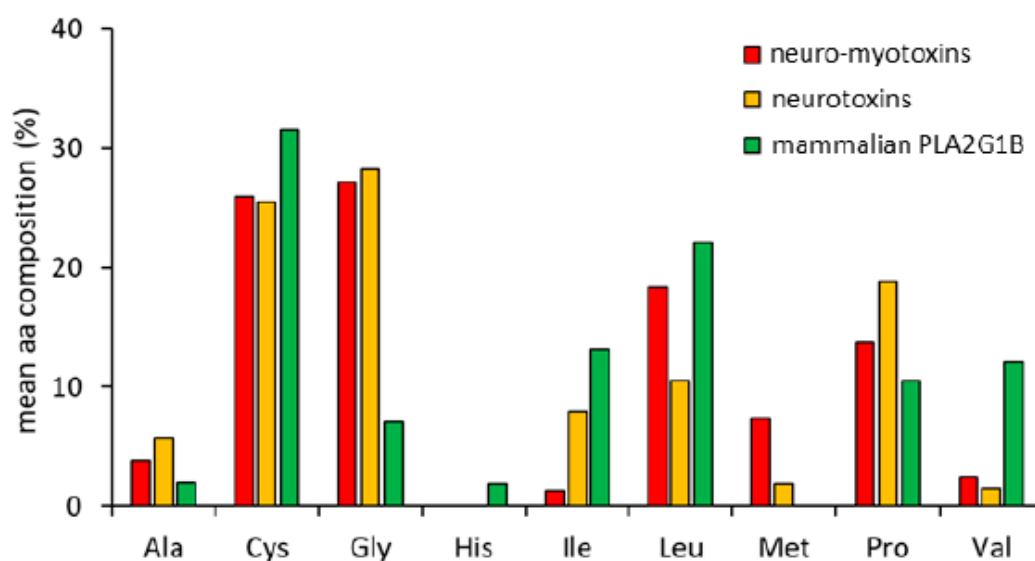

B

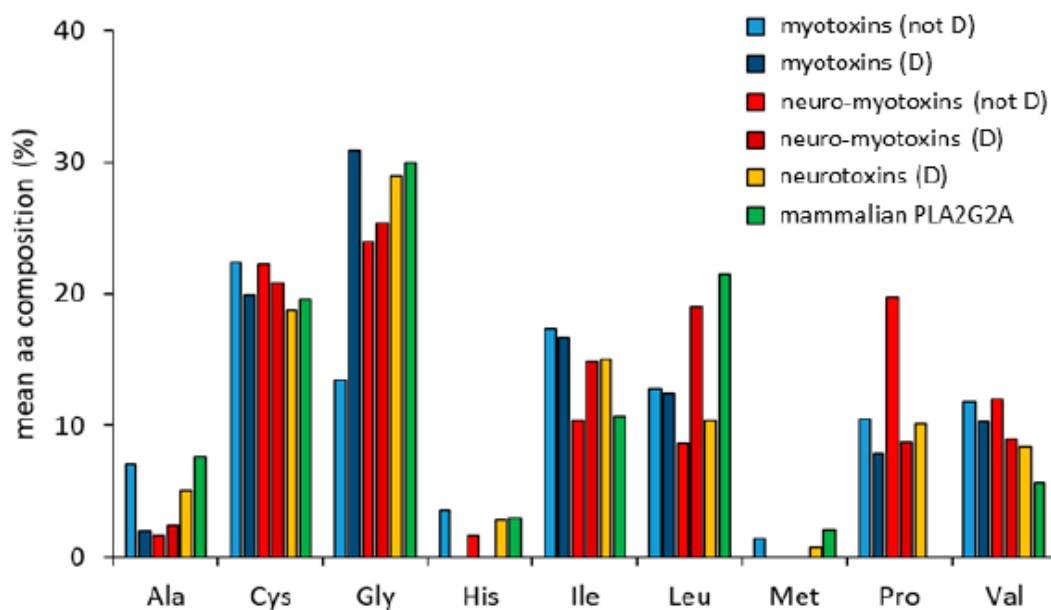

**Figure S1.** Percentage of presence of the amino acids A, G, V, L, I, H, P, C, M in the central region of toxins belonging to the group I and mammalian PLA2G1B homologs (panel A) and of toxins of group II and mammalian PLA2G2B homologs (panel B). Other details are described in the main text, Figure 3.

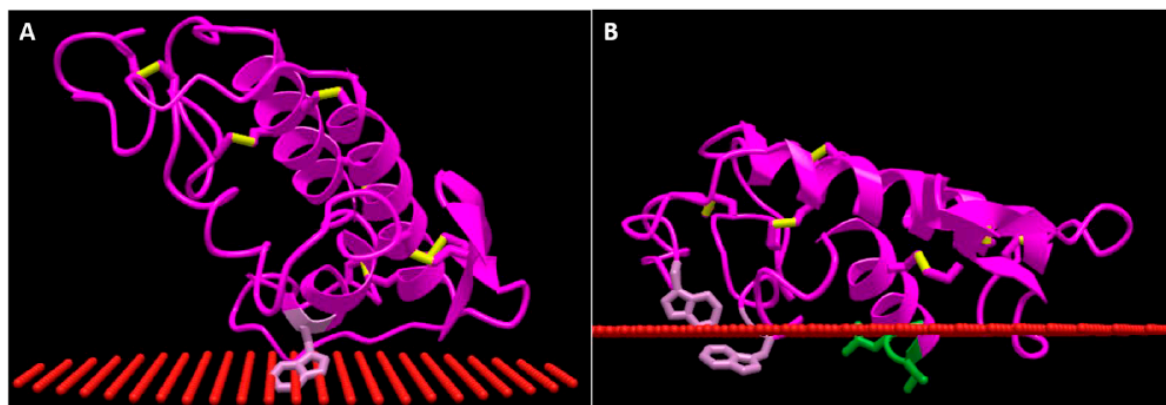

**Figure S2.** Inclination of PLA2G1B and notexin relative to the plasma membrane (PM). **(A)** The tryptophan in position 3 and the charged amino acids in the C-terminal region of PLA2G1B cause the protein to form an angle with the PM. **(B)** In notexin, as in other G1 toxins, tryptophan residues present in 18-19 and in the C-terminal region, together with hydrophobic amino acids in the first alpha-helix, cause the protein to assume a position parallel to the PM.
